# Supplementary material for: Unequal contribution of two paralogous CENH3 variants in cowpea centromere function
Source: Commun Biol. 2020 Dec 15;3:775. doi: 10.1038/s42003-020-01507-x (PMC7738545; doi:10.1038/s42003-020-01507-x)
Supplement: Supplementary file 1 — Supplementary Information [file 42003_2020_1507_MOESM1_ESM.pdf]

## Supplementary Information

### Tables

**Supplementary Table 1: *Vigna* species used in this study.**

| Species                                                                                                | Section       | Status           | Origin      | Genbank accession No. |
|--------------------------------------------------------------------------------------------------------|---------------|------------------|-------------|-----------------------|
| <i>Vigna unguiculata</i> L. Walp. subsp. <i>unguiculata</i> cv. -gr. <i>unguiculata</i> (IT86D-1010)   | Catiang       | cultivated       | Nigeria     | IT86D-1010            |
| <i>Vigna unguiculata</i> L. Walp. subsp. <i>unguiculata</i> cv. -gr. <i>unguiculata</i> (IT97K-499-35) | Catiang       | cultivated       | Nigeria     | IT97K-499-35          |
| <i>Vigna unguiculata</i> L. Walp. subsp. <i>unguiculata</i> cv. -gr. <i>biflora</i>                    | Catiang       | cultivated       | France      | PHASEO NI147          |
| <i>Vigna unguiculata</i> L. Walp. subsp. <i>unguiculata</i> cv. -gr. <i>unguiculata</i> (NI5)          | Catiang       | cultivated       | USA         | PHASEO NI5            |
| <i>Vigna unguiculata</i> L. Walp. subsp. <i>unguiculata</i> cv. -gr. <i>unguiculata</i> (NI22)         | Catiang       | cultivated       | Congo       | PHASEO NI22           |
| <i>Vigna unguiculata</i> L. Walp. subsp. <i>unguiculata</i> cv. -gr. <i>unguiculata</i> (NI139)        | Catiang       | cultivated       | Cameroon    | PHASEO NI139          |
| <i>Vigna unguiculata</i> L. Walp. subsp. <i>unguiculata</i> cv. -gr. <i>unguiculata</i> (NI784)        | Catiang       | cultivated       | India       | PHASEO NI784          |
| <i>Vigna unguiculata</i> L. Walp. subsp. <i>unguiculata</i> cv. -gr. <i>unguiculata</i> (NI1183)       | Catiang       | cultivated       | China       | PHASEO NI1183         |
| <i>Vigna unguiculata</i> L. subsp. <i>alba</i>                                                         | Catiang       | wild             | Congo       | PHASEO NI1656         |
| <i>Vigna unguiculata</i> L. Walp. subsp. <i>unguiculata</i> var. <i>spontanea</i>                      | Catiang       | wild             | Kenya       | PHASEO NI2210         |
| <i>Vigna unguiculata</i> L. Walp. subsp. <i>baoulensis</i>                                             | Catiang       | wild             | Ghana       | PHASEO NI933          |
| <i>Vigna unguiculata</i> L. Walp. subsp. <i>stenophylla</i>                                            | Catiang       | wild             | Botswana    | PHASEO NI1419         |
| <i>Vigna unguiculata</i> L. Walp. subsp. <i>pawekiae</i>                                               | Catiang       | wild             | Malawi      | PHASEO NI1638         |
| <i>Vigna unguiculata</i> L. Walp. subsp. <i>unguiculata</i> cv.-gr. <i>sesquipedalis</i>               | Catiang       | cultivated       | Guyana      | PHASEO NI126          |
| <i>Vigna aconitifolia</i> (Jacq.) <i>Maréchal</i>                                                      | Aconitifoliae | cultivated       | India       | PHASEO NI41           |
| <i>Vigna angularis</i> (Willd.) Ohwi & H. Ohashi var. <i>angularis</i>                                 | Angulares     | cultivated       | China       | PHASEO NI615          |
| <i>Vigna mungo</i> Hepper var. <i>mungo</i>                                                            | Ceratotropis  | cultivated       | Australia   | PHASEO NI515          |
| <i>Vigna radiata</i> R. Wilczek var. <i>radiata</i>                                                    | Ceratotropis  | cultivated       | Iran        | PHASEO NI4            |
| <i>Vigna reflexo-pilosa</i> Hayata var. <i>glabra</i> (4x)                                             | Angulares     | cultivated       | Philippines | PHASEO NI532          |
| <i>Vigna reflexo-pilosa</i> Hayata var. <i>reflexo-pilosa</i> (4x)                                     | Angulares     | wild             | Japan       | PHASEO NI1684         |
| <i>Vigna trilobata</i> Verdc.                                                                          | Aconitifoliae | wild             | Sri Lanka   | PHASEO NI453          |
| <i>Vigna vexillata</i> A. Rich.                                                                        | Plectotropis  | cultivated       | Indonesia   | PHASEO NI1859         |
| <i>Vigna umbellata</i> (Thunb.) Ohwi & H. Ohashi var. <i>umbellata</i>                                 | Angulares     | cultivated       | Congo       | PHASEO NI204          |
| Transgenic cowpea (IT86D-1010) AtDD45 <sub>pro</sub> :dsRED-Express                                    | Catiang       | Transgenic plant | Australia   | Gursansky et al. 2020 |

**Supplementary Table 2: Primers and TaqMan based probes used in this study.**

| Name                       | 5'-3' Sequence                      |
|----------------------------|-------------------------------------|
| Vigna CENH3F               | ATGGCGAGAGTGAAGCACACGCCAGCTTCGC     |
| Vigna CENH3R               | TCACCAAGGCCTTCTATTCTCCAAGCCTCCGAGCC |
| V.ungCENH3F                | ACAGACTCAGGGAAGGAAGA                |
| V.ungCENH3R                | GGCAGCCGGGATAAGAAG                  |
| CENH3.1Probe               | HEX-GGAACA+G+C+GGCG-IABkFQ          |
| CENH3.2Probe               | FAM-G+GAACA+A+T+GG+CG-IABkFQ        |
| Ubiquitin28F               | GATTCTGAAGGAGCTCAAGGAC              |
| Ubiquitin28R               | CCCATTATAGTTGCTTGCCAATG             |
| Ubiquitin28Probe           | ROX-AGAAAGACCCTCCAACCTCTTGCA-BBQ    |
| GAPDH-F                    | CAATGATAGCTGCACCACCAACTG            |
| GAPDH-R                    | CTAGCTGCCCTTCCACCTCTCCA             |
| 455 bp tandem repeats      | Cy5-CAACGTGTGTTGATCCTTCT            |
| pVuKB2F                    | CATGCATACACCAAGAAAGATC              |
| pVuKB2R                    | TGTGCCCTACTTTTGCTTGAGTC             |
| 721-bp tandem repeats      | GGCTCACAACATTGTTTTCGC               |
| 721-bp tandem repeats      | TTGGTATTGAGAGCTGGST                 |
| 1600-bp tandem repeats     | CCGTCGATAAGAAGCAAAATCGT             |
| 1600-bp tandem repeats     | ACTTGATATTTGTIACCTTCCAATGGT         |
| PPT F1                     | AGGAAAGGCCATCGTTGAAGAT              |
| PPT R1                     | TGTCTCGATGATGTTGACG                 |
| CAS9 F1                    | ACCTACCACGATCTCCTCAAGA              |
| CAS9 R1                    | CTGAAACCTGAGCCTTCTGGAT              |
| AtU6 26 F1                 | TGAACCGTAGCTTTCGTTTTCT              |
| AtU6 26 R1                 | CAAGAAAGCTGGGTCTAG                  |
| Sg5CENH3.1F                | AAGCCTGCGACAAGAAGTCG                |
| Sg5CENH3.2F                | TGTGATTGAAGCCTGTGACTAGAAGTAA        |
| Sg5CENH3 common R          | CTGAAAATGACGAATCTCGCG               |
| Sg3CENH3.1F                | TTTCACTTCTCAAACCAAACCCCT            |
| Sg3CENH3.1R                | TCAACTCAAACGAAGAACGCG               |
| Sg4CENH3.1F                | TCACCTTCTCAAACCAAACCCCTG            |
| Sg4CENH3.1R                | TCAGAACACCAAAAATGAATCAGCA           |
| Sg4CENH3.2F                | CACTCAAAGCCAGTCGCG                  |
| Sg4CENH3.2R                | TCAGAACACCAAAAATGTATCAGCA           |
| Drop off probe Sg3CENH3.1  | HEX-TGAGCCCTTCTACGACTTCTTGTGCG-BHQ1 |
| Reference probe Sg3CENH3.1 | FAM-ACGTACCCTGCGGCTCCTCTT-IABkFQ    |
| Drop off probe Sg4CENH3.1  | FAM-ACGTACCCTGCGGCTCCTCTT-IABkFQ    |
| Reference probe Sg4CENH3.1 | HEX-TCAACTCAAACGAAGAAGCGTTT-BHQ1    |
| Drop off probe Sg4CENH3.2  | FAM-ACGTACCCTGCGGCTCCTCTT-IABkFQ    |
| Reference probe Sg4CENH3.2 | HEX-TCAACTCAAACGAAGAAGCGAGTTT-BHQ1  |
| Drop off probe             |                                     |
| Sg5CENH3 Common            | HEX-TTCCTTCCCTGAGTCTGTGGCG-BHQ1     |
| Reference probe Sg5CENH3.1 | FAM-AGCGCCGCTGTTCTCTGG-IABkFQ       |
| Drop off probe             |                                     |
| Sg5CENH3 Common            | HEX-TTCCTTCCCTGAGTCTGTGGCG-BHQ1     |
| Reference probe_           |                                     |
| Sg5CENH3.2                 | FAM-AGCGCCATTGTTCTCTGGCT-IABkFQ     |
| npII_F1                    | GCAGTTCATTAGGGCACCG                 |
| npII_R1                    | CGTGTCAAGTTGTGAGTGCC                |
| pDEST_R4R3_F1              | ACCATCGATTTACGCCAAGCTATCAACTTTG     |
| pDEST_R4R3_R1              | ACCGGTACCGACGGCCAGTGAATTATCAAC      |
| NOS_R1                     | CTCACCATACCGGTGATCTAGTAACATAGATGAC  |
| At_pDD45_F2                | TCTCGTAACTCAATCATCGC                |

**Supplementary Table 3:** Characterization of sequence CENH3.1 and CENH3.2 induced by CRISPR/Cas9 based genome editing.

| Generation | Line name  | CENH3.1             | Allele                 | Sequence                                           | CENH3.2   | Allele                 | Sequence                                      |
|------------|------------|---------------------|------------------------|----------------------------------------------------|-----------|------------------------|-----------------------------------------------|
| T0         | #5B1       | Wild type           | Chimera                | GAAGAAGCAGCAGCAGCAGCGCCACAGA<br>CTCAGGGAAGGAAGAA   | Wild type | Chimera                | AAGAAGAAGCAGCAGCGCCACAGACTCAGGGA<br>AGGAAGAA  |
|            |            | -1                  |                        | GAAGAAGCAGCAGCAGCAGCGCCACAGA<br>C-CAGGGAAGGAAGAA   | 1         |                        | AAGAAGAAGCAGCAGCGCCACAGACCTCAGGG<br>AAGGAAGAA |
|            |            | -1                  |                        | GAAGAAGCAGCAGCAGCAGCGCCACAGA-<br>TCAGGGAAGGAAGAA   | -4        |                        | AAGAAGAAGCAGCAGCGCCAC-----<br>TCAGGGAAGGAAGAA |
|            |            | 1                   |                        | GAAGAAGCAGCAGCAGCAGCGCCACAGA<br>CCTCAGGGAAGGAAGAA  | -7        |                        | AAGAAGAAGCAGCAGCGC-----<br>TCAGGGAAGGAAGAA    |
|            |            | -4                  |                        | GAAGAAGCAGCAGCAGCAGCGCCAC-----<br>TCAGGGAAGGAAGAA  | -6        |                        | AAGAAGAAGCAGCAGCGCCA-----<br>CAGGGAAGGAAGAA   |
|            |            |                     |                        |                                                    | -6        |                        | AAGAAGAAGCAGCAGCGCC-----<br>TCAGGGAAGGAAGAA   |
|            |            |                     |                        |                                                    | -9        |                        | AAGAAGAAGCAGCAGC-----<br>TCAGGGAAGGAAGAA      |
|            |            |                     |                        |                                                    |           |                        | AAGAAGAAGCAGCAGCGCCACAGACTCAGGGA<br>AGGAAGAA  |
| T1         | #5B1-12    | -1                  | Chimera                | GAAGAAGCAGCAGCAGCAGCGCCACAGA-<br>TCAGGGAAGGAAGAA   | Wild type | Heterozygous           | AAGAAGAAGCAGCAGCGCCACAG-----<br>GGAAGGAAGAA   |
|            |            | -4                  |                        | GAAGAAGCAGCAGCAGCAGCGCCAC-----<br>TCAGGGAAGGAAGAA  | -6        |                        |                                               |
|            |            | -48                 |                        | GAAGAAGCAGCAGCAGCAGCG-----<br>-----                |           |                        |                                               |
|            | #5B1-13    | Wild type           | Chimera                | GAAGAAGCAGCAGCAGCAGCGCCACAGA<br>CTCAGGGAAGGAAGAA   | 1         | Biallelic heterozygous | AAGAAGAAGCAGCAGCGCCACAGACCTCAGGG<br>AAGGAAGAA |
|            |            | 1                   |                        | GAAGAAGCAGCAGCAGCAGCGCCACAGA<br>CCTCAGGGAAGGAAGAA  | -9        |                        | AAGAAGAAGCAGCAGC-----<br>TCAGGGAAGGAAGAA      |
|            |            | -1                  |                        | GAAGAAGCAGCAGCAGCAGCGCCACAGA<br>C-CAGGGAAGGAAGAA   |           |                        |                                               |
|            |            | -3                  |                        | GAAGAAGCAGCAGCAGCAGCGCCAC-----<br>CTCAGGGAAGGAAGAA |           |                        |                                               |
|            |            | -9                  |                        | GAAGAAGCAGCAGCAGCAGC-----<br>TCAGGGAAGGAAGAA       |           |                        |                                               |
|            |            | -34                 |                        | GAAGAAACA-----A                                    |           |                        |                                               |
|            |            |                     |                        |                                                    |           |                        |                                               |
| T2         | Cenh3.1 KO | -1                  | Homozygous             | GAAGAAGCAGCAGCAGCAGCGCCACAGA-<br>TCAGGGAAGGAAGAA   | Wild type | Heterozygous           | AAGAAGAAGCAGCAGCGCCACAGACTCAGGGA<br>AGGAAGAA  |
|            | #5B1-12.2  |                     |                        |                                                    | -6        |                        | AAGAAGAAGCAGCAGCGCCACAG-----<br>GGAAGGAAGAA   |
|            | #5B1-12.3  | Wild type           | Wild type              | GAAGAAGCAGCAGCAGCAGCGCCACAGA<br>CTCAGGGAAGGAAGAA   | Wild type | Chimera                | AAGAAGAAGCAGCAGCGCCACAGACTCAGGGA<br>AGGAAGAA  |
|            |            |                     |                        |                                                    | -6        |                        | AAGAAGAAGCAGCAGCGCCACAG-----<br>GGAAGGAAGAA   |
|            |            |                     |                        |                                                    | 1         |                        | AAGAAGAAGCAGCAGCGCCACAGACCTCAGGG<br>AAGGAAGAA |
|            |            |                     |                        |                                                    | -4        |                        | AAGAAGAAGCAGCAGCGCCAC-----<br>TCAGGGAAGGAAGAA |
|            | #5B1-12.4  | -1                  | Biallelic heterozygous | GAAGAAGCAGCAGCAGCAGCGCCACAGA-<br>TCAGGGAAGGAAGAA   | -6        | Biallelic heterozygous | AAGAAGAAGCAGCAGCGCCACAG-----<br>GGAAGGAAGAA   |
|            |            | A to T substitution |                        | GAAGAAGCAGCAGCAGCAGCGCCACAGT<br>CTCAGGGAAGGAAGAA   | -2        |                        | AAGAAGAAGCAGCAGCGCCACAGAC--<br>AGGGAAGGAAGAA  |
| T3         | Cenh3.2 KO | A to T substitution | Heterozygous           | GAAGAAGCAGCAGCAGCAGCGCCACAGT<br>CTCAGGGAAGGAAGAA   | -2        | Homozygous             | AAGAAGAAGCAGCAGCGCCACAGAC--<br>AGGGAAGGAAGAA  |

**Supplementary Table 4:** Characterization of *Cenh3.2* KO plants of cowpea induced by CRISPR/Cas9 based genome editing.

| Genotype                        | Plant number | Number of pods per plant |             | Seed weight per plant (in g) | Length of selected high quality pods, n=5 (in cm) |      |      |      |      |         |    | Number of seeds per high quality pods, n=5 |    |    |    |         |   |   |                 |   |   |         |       |  |  |  | Seed weight of high quality pods (in g) |
|---------------------------------|--------------|--------------------------|-------------|------------------------------|---------------------------------------------------|------|------|------|------|---------|----|--------------------------------------------|----|----|----|---------|---|---|-----------------|---|---|---------|-------|--|--|--|-----------------------------------------|
|                                 |              |                          |             |                              |                                                   |      |      |      |      |         |    | Normal seeds                               |    |    |    |         |   |   | Shriveled seeds |   |   |         |       |  |  |  |                                         |
|                                 |              | High quality             | Low quality | Seeds                        | 1                                                 | 2    | 3    | 4    | 5    | average | 1  | 2                                          | 3  | 4  | 5  | average | 1 | 2 | 3               | 4 | 5 | average | Seeds |  |  |  |                                         |
| Cenh3.2 KO 4-3 (T4 generation)  | 1            | 17                       | 0           | 20.4                         | 17                                                | 14   | 14.5 | 12   | 14   | 14.3    | 10 | 9                                          | 10 | 7  | 9  | 9       | 2 | 0 | 0               | 1 | 4 | 1.4     | 8.1   |  |  |  |                                         |
|                                 | 2            | 15                       | 4           | 25.7                         | 16.5                                              | 17.5 | 20   | 16   | 18   | 17.6    | 11 | 12                                         | 13 | 11 | 12 | 11.8    | 0 | 2 | 0               | 2 | 0 | 0.8     | 10.8  |  |  |  |                                         |
|                                 | 3            | 16                       | 2           | 23.1                         | 14.5                                              | 16.5 | 17   | 16.5 | 18   | 16.5    | 8  | 14                                         | 12 | 13 | 11 | 11.6    | 1 | 0 | 2               | 0 | 2 | 1       | 10    |  |  |  |                                         |
|                                 | 4            | 13                       | 0           | 21                           | 19                                                | 17   | 17.5 | 18.5 | 18   | 18      | 14 | 12                                         | 12 | 13 | 13 | 12.8    | 1 | 1 | 1               | 0 | 0 | 0.6     | 11.7  |  |  |  |                                         |
|                                 | 5            | 12                       | 2           | 19.1                         | 16                                                | 18   | 20   | 15.5 | 17   | 17.3    | 10 | 12                                         | 15 | 12 | 9  | 11.6    | 4 | 3 | 0               | 2 | 4 | 2.6     | 10    |  |  |  |                                         |
|                                 | average      | 14.6                     | 1.6         | 21.86                        | -                                                 | -    | -    | -    | -    | 16.74   | -  | -                                          | -  | -  | -  | 11.36   | - | - | -               | - | - | 1.28    | 10.12 |  |  |  |                                         |
| Cenh3.2 KO 4-14 (T4 generation) | 1            | 16                       | 0           | 20.6                         | 16.5                                              | 15.5 | 16   | 16   | 17.5 | 16.3    | 11 | 10                                         | 12 | 9  | 12 | 10.8    | 1 | 1 | 0               | 5 | 2 | 1.8     | 9.2   |  |  |  |                                         |
|                                 | 2            | 12                       | 5           | 24.5                         | 16                                                | 16   | 16   | 18   | 19   | 17      | 10 | 10                                         | 11 | 11 | 14 | 11.2    | 2 | 0 | 1               | 1 | 0 | 0.8     | 12.9  |  |  |  |                                         |
|                                 | 3            | 18                       | 1           | 18.3                         | 18                                                | 18.5 | 18   | 16   | 15   | 17.1    | 11 | 11                                         | 12 | 11 | 9  | 10.8    | 0 | 4 | 0               | 3 | 1 | 1.6     | 7.5   |  |  |  |                                         |
|                                 | 4            | 11                       | 4           | 25.5                         | 15                                                | 18   | 17   | 19   | 19   | 17.6    | 8  | 13                                         | 13 | 12 | 15 | 12.2    | 3 | 0 | 0               | 2 | 0 | 1       | 11.2  |  |  |  |                                         |
|                                 | 5            | 15                       | 1           | 19.4                         | 16.5                                              | 18   | 17   | 16   | 14.5 | 16.4    | 15 | 12                                         | 11 | 8  | 9  | 11      | 0 | 0 | 0               | 4 | 1 | 1       | 10.8  |  |  |  |                                         |
|                                 | average      | 14.4                     | 2.2         | 21.66                        | -                                                 | -    | -    | -    | -    | 16.88   | -  | -                                          | -  | -  | -  | 11.2    | - | - | -               | - | - | 1.24    | 10.32 |  |  |  |                                         |
| Wild type                       | 1            | 17                       | 5           | 22.1                         | 18                                                | 16   | 15.5 | 16   | 16   | 16.3    | 14 | 10                                         | 11 | 10 | 11 | 11.2    | 0 | 0 | 2               | 3 | 1 | 1.2     | 10    |  |  |  |                                         |
|                                 | 2            | 22                       | 5           | 25                           | 17                                                | 15.5 | 13.5 | 16   | 15   | 15.4    | 12 | 10                                         | 9  | 10 | 9  | 10      | 0 | 0 | 0               | 1 | 0 | 0.2     | 9.1   |  |  |  |                                         |
|                                 | 3            | 16                       | 6           | 24.2                         | 15.5                                              | 17   | 18   | 16.5 | 17   | 16.8    | 10 | 11                                         | 14 | 11 | 13 | 11.8    | 1 | 2 | 0               | 0 | 0 | 0.6     | 11.4  |  |  |  |                                         |
|                                 | 4            | 18                       | 0           | 24.9                         | 16.5                                              | 18.5 | 17.5 | 17   | 15   | 16.9    | 12 | 15                                         | 12 | 11 | 11 | 12.2    | 2 | 0 | 0               | 4 | 0 | 1.2     | 10.5  |  |  |  |                                         |
|                                 | average      | 18.25                    | 4           | 24.05                        | -                                                 | -    | -    | -    | -    | 16.35   | -  | -                                          | -  | -  | -  | 11.3    | - | - | -               | - | - | 0.8     | 10.25 |  |  |  |                                         |

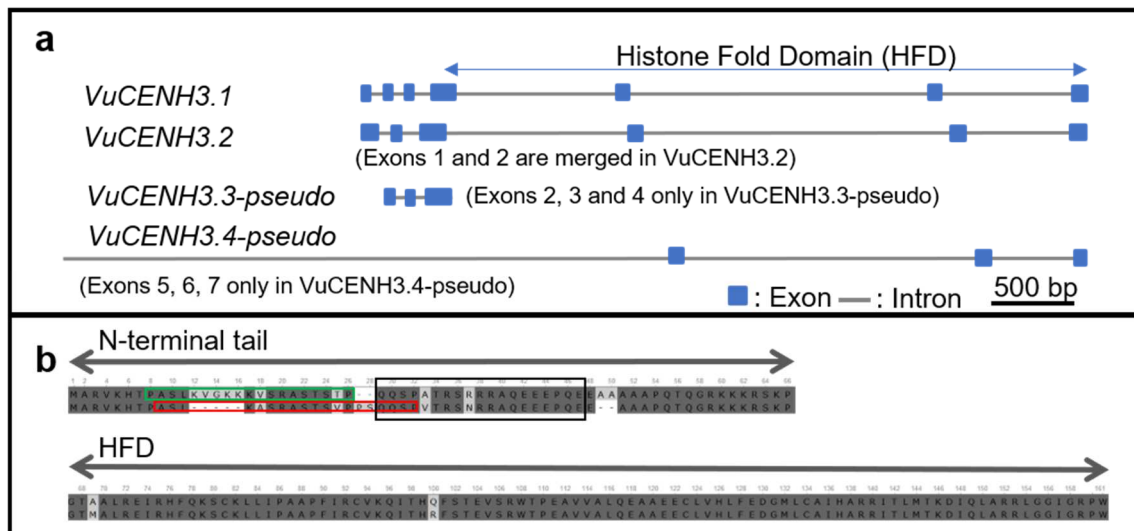

**Supplementary Fig. 1: Schematic illustration of the cowpea CENH3 gene exon and intron structure.**

**a** Alignment of CENH3.1 and CENH3.2 amino acid sequences. **b** Green, red and black boxes indicate the position of the peptides used for the generation of CENH3.1, CENH3.2 and CENH3 common antibody, respectively.

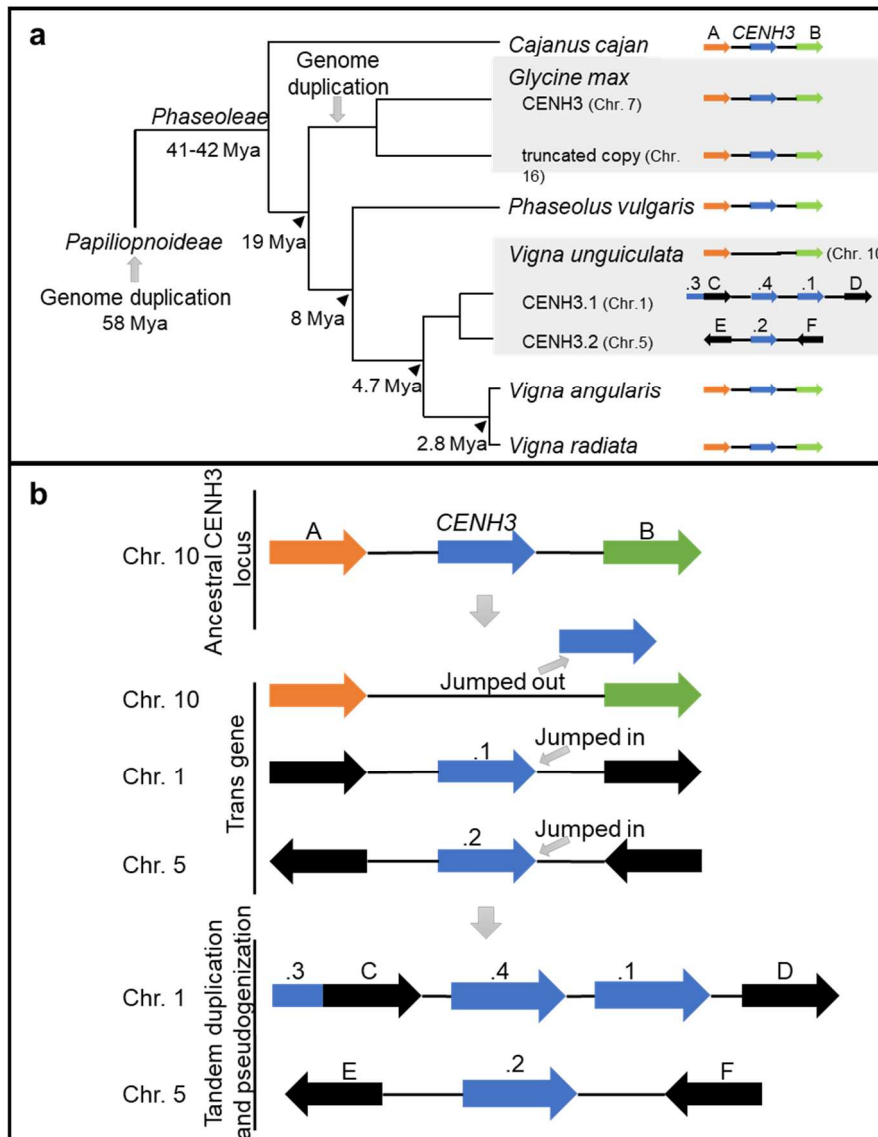

**Supplementary Fig. 2: Phylogenetic tree based on the *CENH3* amino acid sequence, with a scheme of the chromosomal *CENH3* gene locus on the right of each species.**

**a** Genome duplication events and node ages are based on (Lavin et al. 2005; Cannon et al. 2010; Kang et al. 2014). **b** Schemata of possible mechanism of *CENH3* duplication in cowpea genome. Blue arrows indicate *CENH3* gene locus and nearby genes indicated by different colours as A: Rhodanese-like domain-containing protein, B: WRKY transcriptional factor, C: unknown (exosome complex exonuclease), D: unknown, E: calcium-dependent lipid-binding domain-contained protein, F: 60S ribosomal protein L18A, respectively.

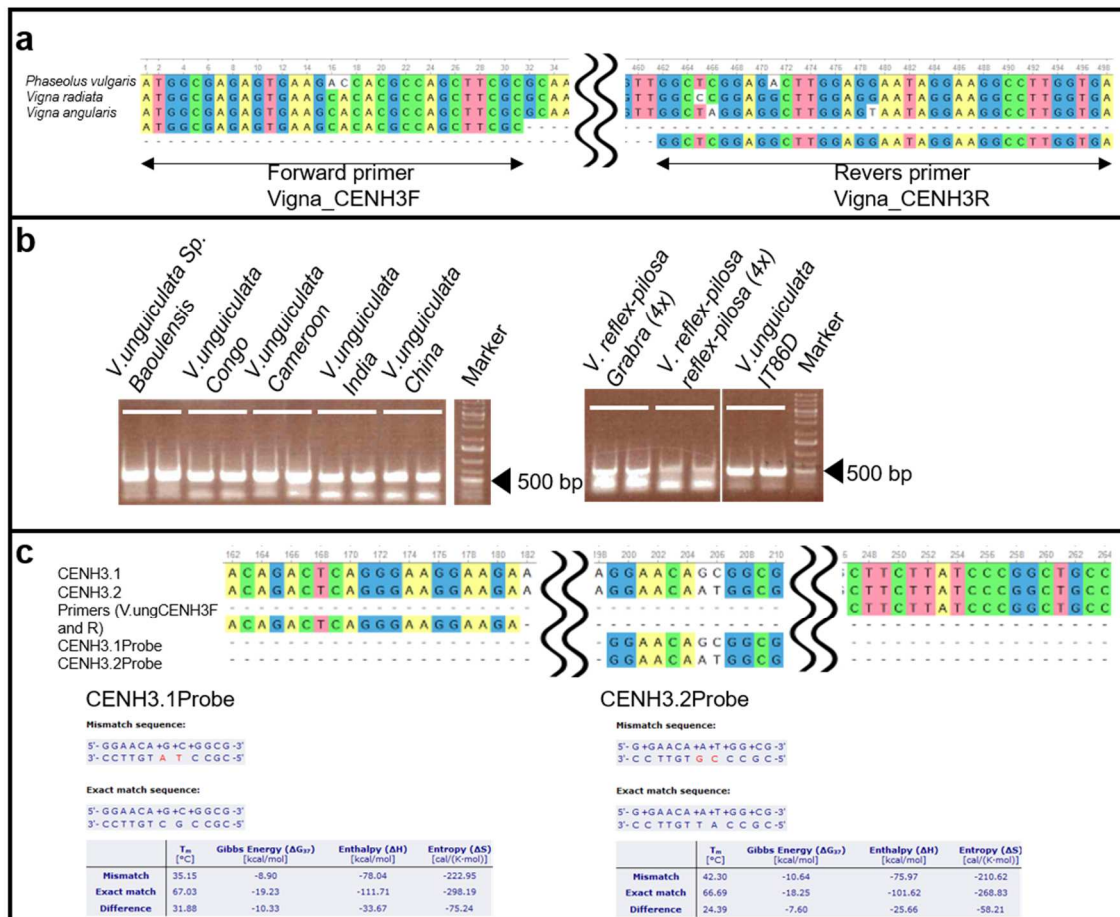

### Supplementary Fig. 3: Primer design for *CENH3* genes.

**a** Multiple alignments of cDNA sequence from *Phaseolus vulgaris*, *Vigna radiata* and *Vigna angularis* for designing of RT-PCR primer sequences for cloning of *CENH3* sequences from *Vigna* species. **b** RT-PCR products from six *V. unguiculata* accessions and two *V. reflex-pilosa* accessions confirm the *CENH3* amplification. **c** Multiple alignments of cDNA sequences of cowpea *CENH3.1*, *CENH3.2*, primers for qRT-PCR (V.ungCENH3F and R), and TaqMan probes (CENH3.1Probe and CENH3.2Probe) and annealing temperature calculation of probes.

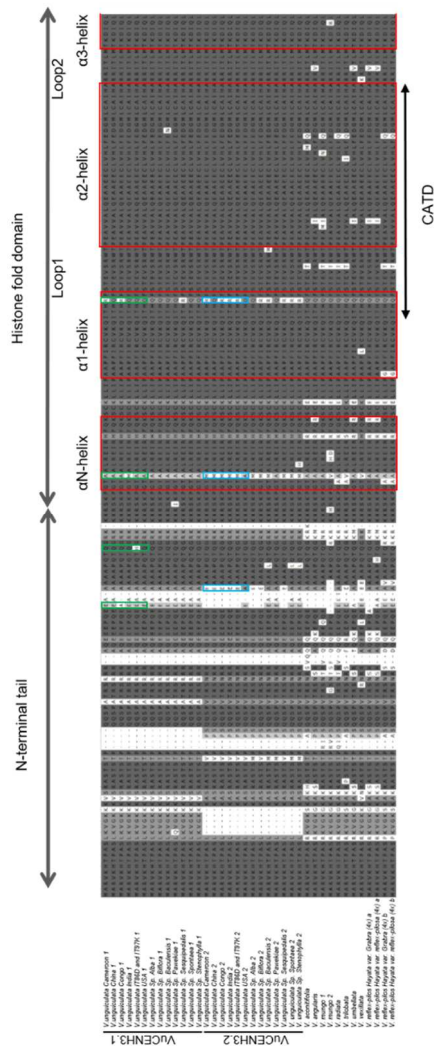

#### Supplementary Fig. 4: Diversity of CENH3 in *Vigna* species.

Multiple alignments of CENH3 proteins from different cowpea genotypes of different origin (*V. unguiculata* -Cameroon, -China, -Congo, -India, -IT86D-1010, -IT97K-499-35 and -USA), different subspecies or varieties of *V. unguiculata* (*alba*, *biflora*, *baoulensis*, *pawekiae*, *sesquipedalis*, *spontanea* and *stenophylla*), different diploid *Vigna* species (*V. aconitifolia*, *V. angularis*, *V. mungo*, *V. radiata*, *V. trilobata*, *V. umbellata* and *V. vexillata*), and different tetraploid *V. reflexo-pilosa* genotypes (*V. reflexo-pilosa* var *glabra* and *V. reflexo-pilosa* var. *reflexo-pilosa*). Conserved CENH3 domains are indicated with red-boxes. CENH3.1 and CENH3.2 amino acid mutations in cowpea accessions indicated with green- and blue-boxes, respectively.

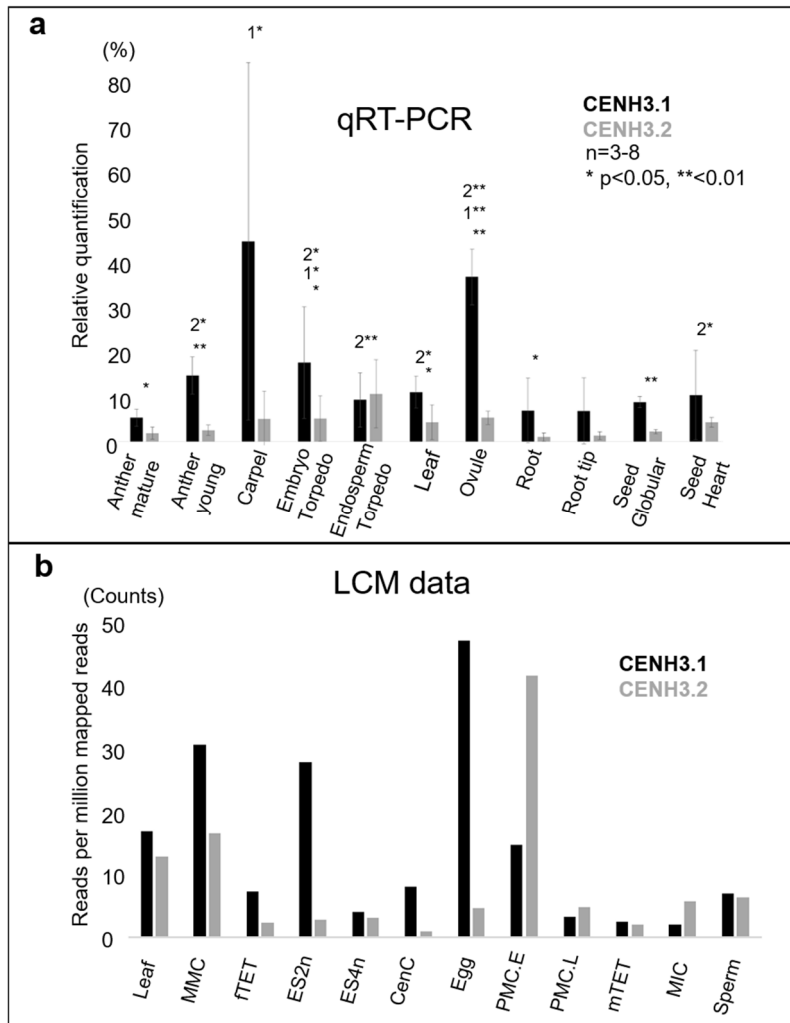

**Supplementary Fig. 5: Gene expression patterns of *CENH3.1* and *CENH3.2* in different tissue and cell types of cowpea.**

**a** qRT-PCR analysis using RNA isolated from different tissues of cowpea. Transcript levels of each gene were normalized to *Ubiquitin28* using the  $\Delta\Delta C_t$ -method (Schmittgen and Livak, 2008). Relative quantification values are calculated by fold change to root *CENH3.2*. **b** RNA-sequencing using RNA isolated from laser capture microdissected cell types of cowpea. Leaf, MMC-megaspore mother cell, tTET-female tetrads, ES2n-embryo sac (2 nuclei), ES4n-embryo sac (4 nuclei), CenC-central cell, egg, PMC.E-early pollen mother cell, PMC.L-late pollen mother cell, mTET-male tetrads, MIC-microspore, sperm. Significant difference between *CENH3.1* and *CENH3.2* within tissue types was indicated \*: p< 0.05, \*\*< 0.01 (t-test). Significant difference compares to root with different tissue types was indicated for *CENH3.1* (1\*: p< 0.05, 1\*\*< 0.01) or *CENH3.2* (2\*: p< 0.05, 2\*\*< 0.01). Indicate SD in figure (a).



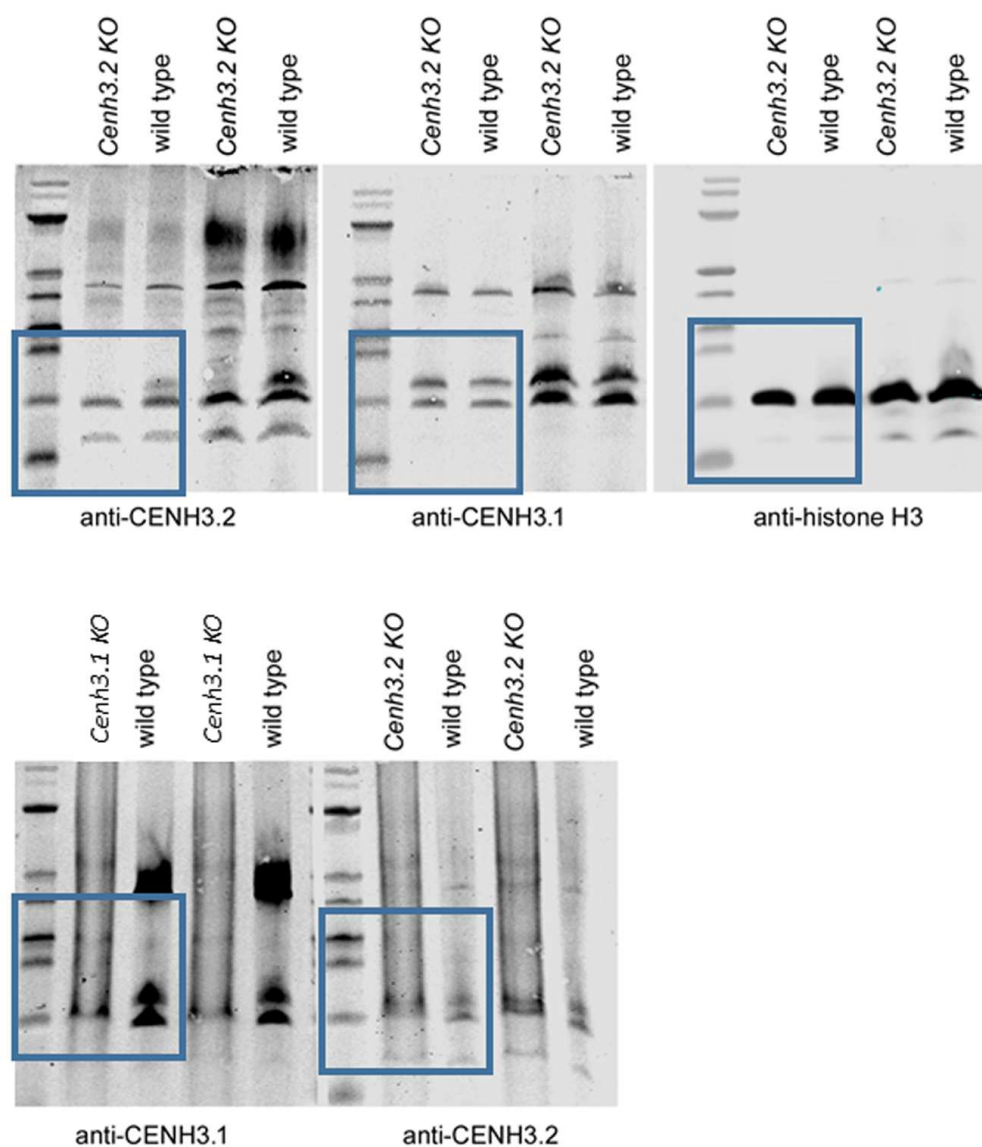

**Supplementary Fig. 7: Uncropped comparative Western blots.**

Western blots of isolated nuclear proteins from wild type, *CenH3.1* and *CenH3.2* KO plants with anti-CENH3.1, anti-CENH3.2 and anti-histone H3. Regions used for Figure 2c, d are indicated.

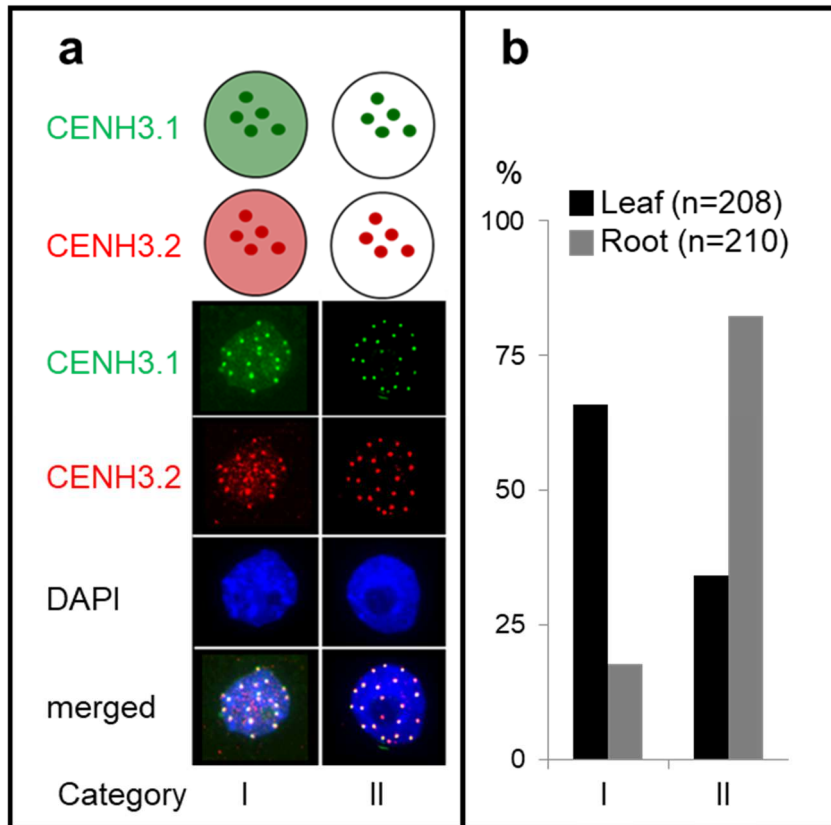

**Supplementary Fig. 8: Distribution of CENH3.1 and CENH3.2 immunosignals in isolated nuclei from leaf and root tissues of cowpea.**

**a** Two categories are determined based on the configurations of CENH3 signals. Category I: Centromeric CENH3.1 and CENH3.2 signals colocalize and nuclei reveal disperse immunosignals. Category II: Centromeric CENH3.1 and CENH3.2 signals colocalize without dispersing signals. Typical examples are shown in (a). **b** Quantification of categorized leaf (n=208) and root (n=210) nuclei. Black bar: leaf nuclei, grey bar: root nuclei.

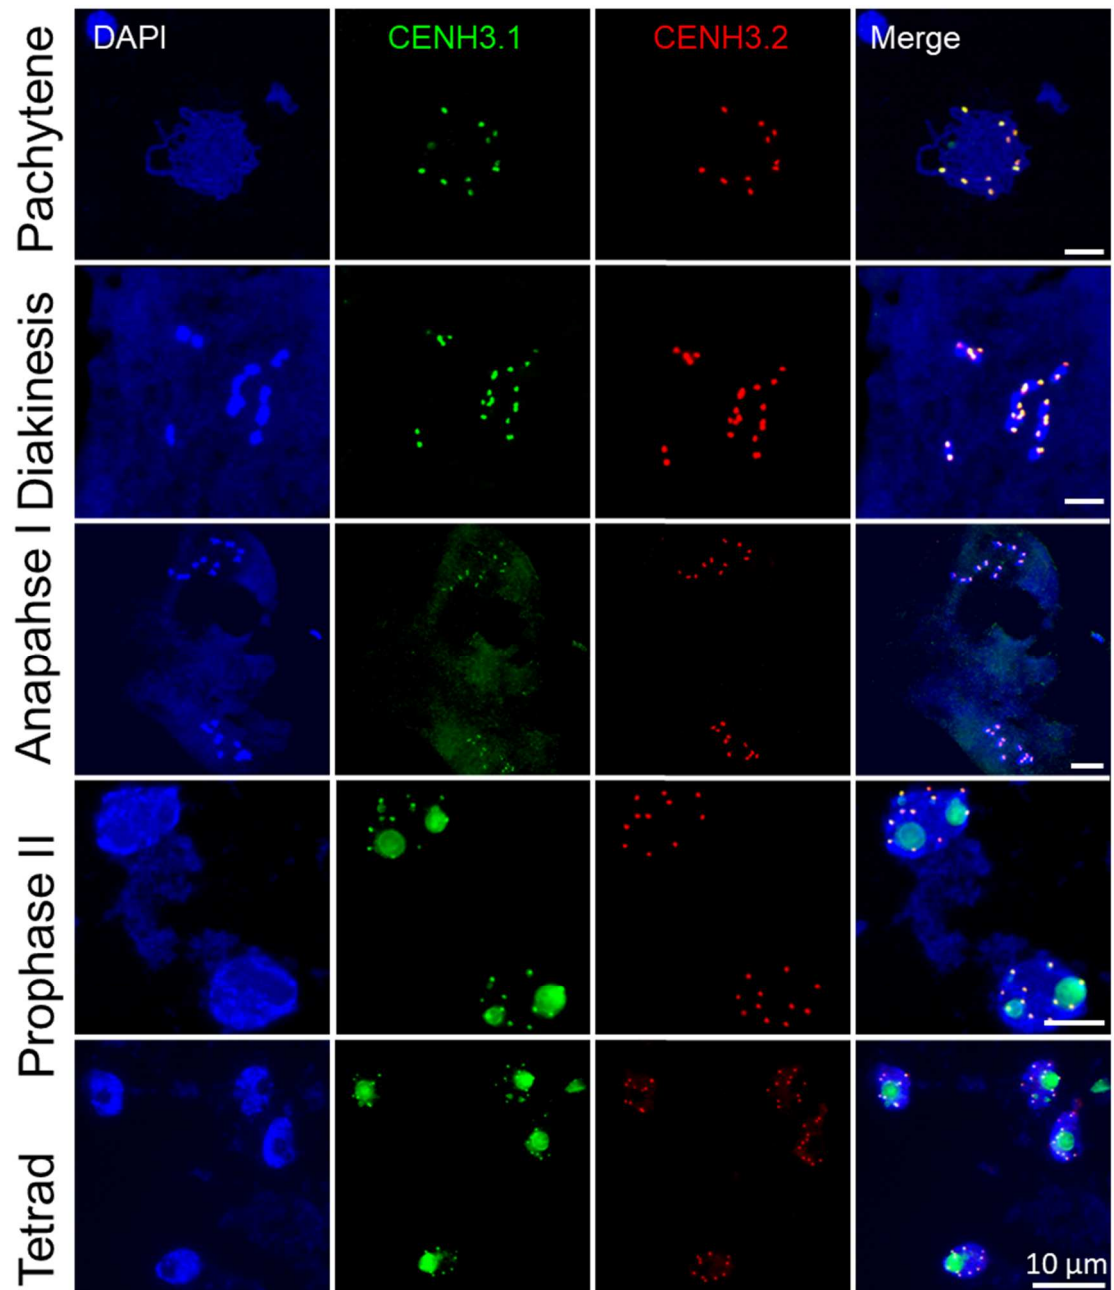

**Supplementary Fig. 9: Centromeric CENH3.1 and CENH3.2 colocalize during all stages of male meiosis in cowpea.**

Distribution of CENH3.1 (green) and CENH3.2 (red) are shown in pachytene, diakinesis, anaphase I, prophase II and tetrad cells.

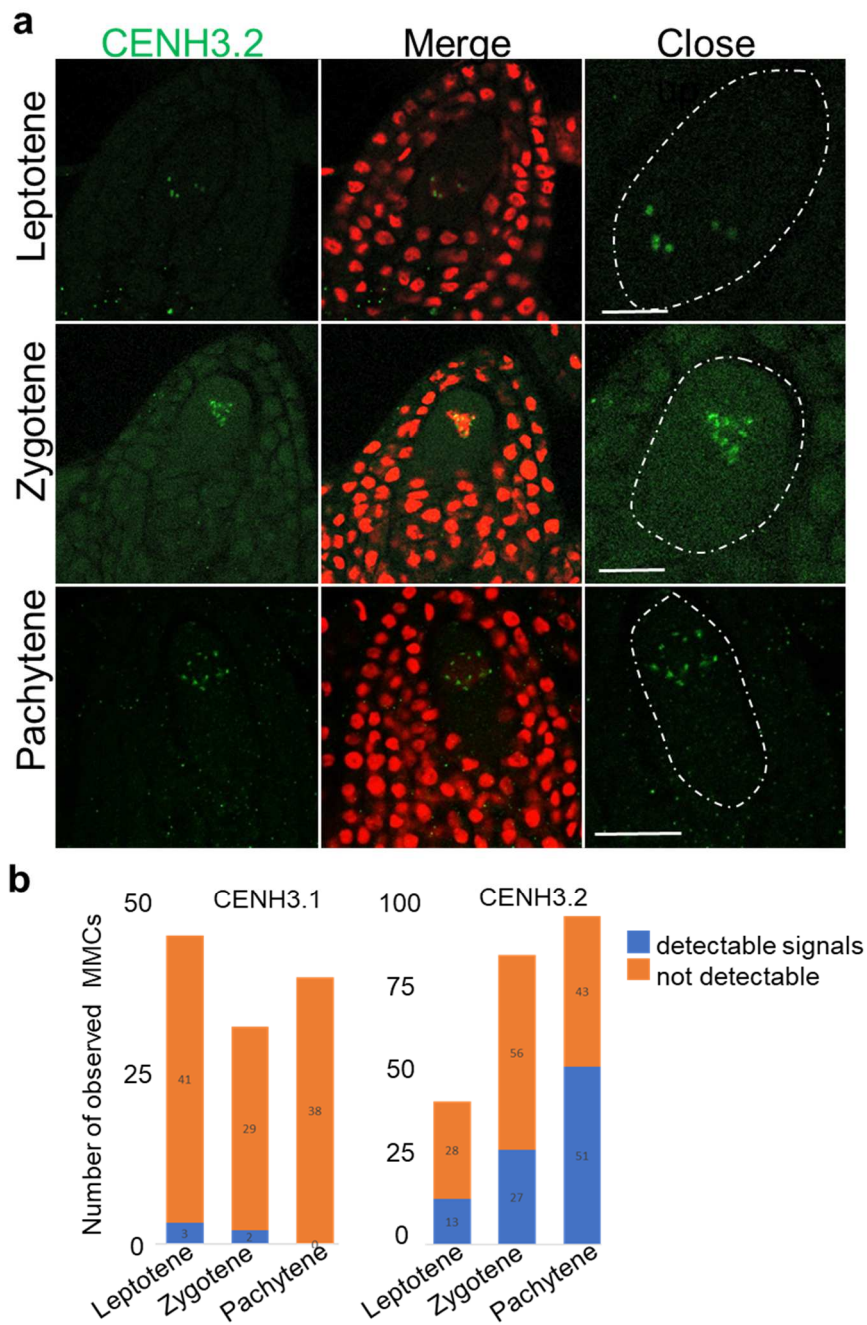

**Supplementary Fig. 10: Distribution of CENH3.1 and CENH3.2 during female meiosis of cowpea tissue sections.**

**a** CENH3.2 immunostaining signals (green) at leptotene, zygotene and pachytene. Nuclei were counterstained with propidium iodide (red). **b** Frequency of observed CENH3.1 and CENH3.2 signals in leptotene, zygotene and pachytene cells. Bars equal 10  $\mu$ m.

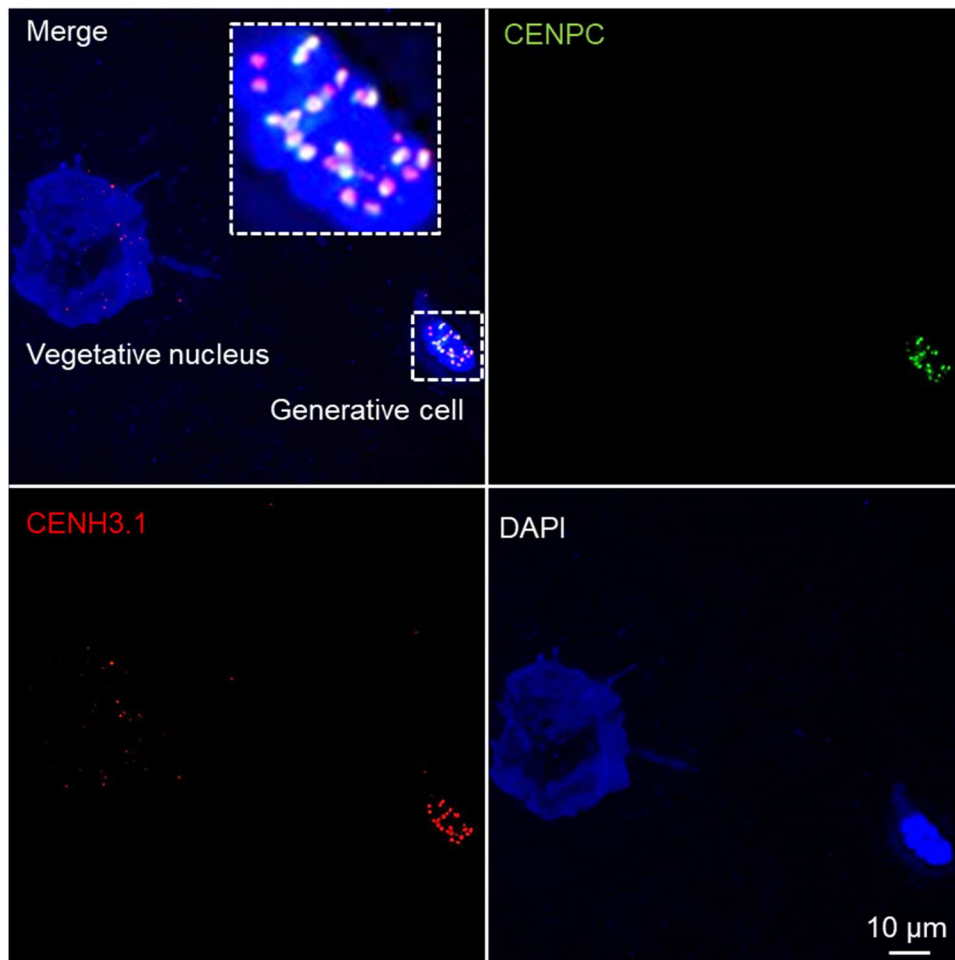

**Supplementary Fig. 11: CENPC localization in matured pollen.**

The generative nucleus of mature cowpea pollen shows colocalizing CENH3.1 (red) and CENPC (green)-specific immunosignals. The vegetative nucleus is free of centromeric immunomarks.

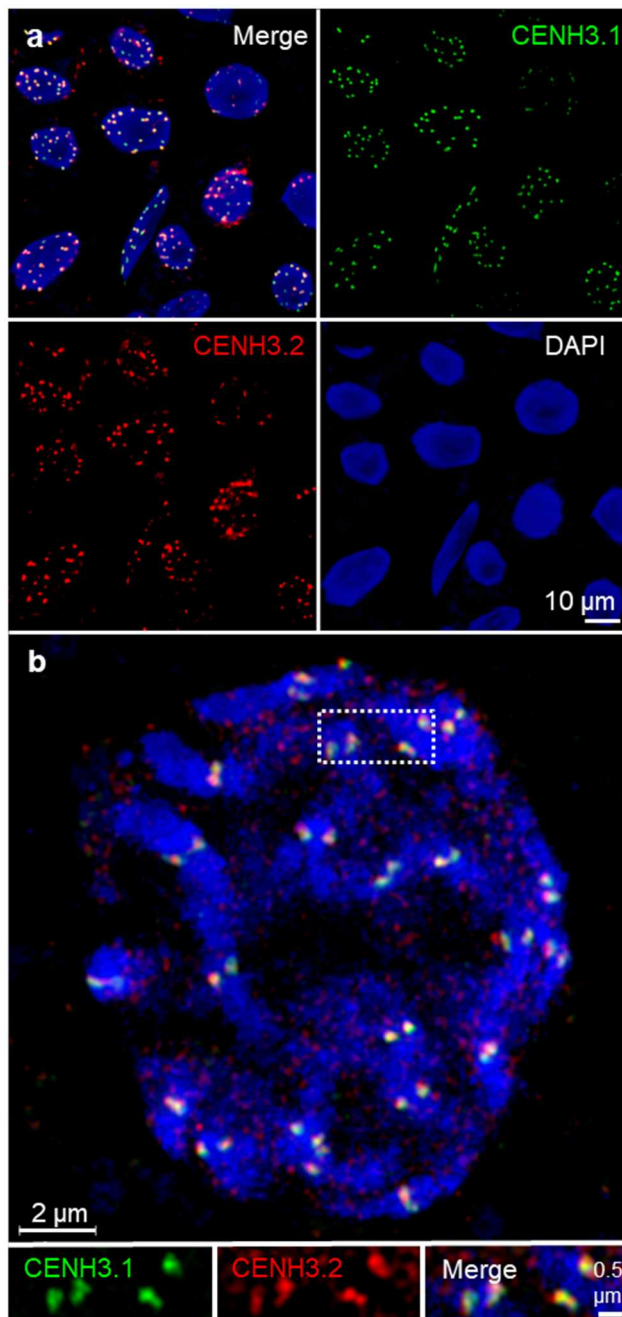

**Supplementary Fig. 12: The centromeres of embryonic cells at early heart stage contain CENH3.1 and CENH3.2.**

**a** and **b** CENH3.1 (green) and CENH3.2 (red) immunosignals colocalize in interphase (**a**) and prometaphase (**b**) cells. Structured Illumination Microscopy by SIM shows that both CENH3 variants occupy different centromeric subdomains (further enlarged inserts).
